# Supplementary material
Source: Springer Nature journal article supplement (https://www.springermedizin.de/resource/supplementary/13063_2011_762_MOESM4_ESM.pdf/9618672)
Supplement: MOESM4 [file 9618672]

**Screening and Eligibility  
Assessment**

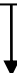

**Baseline Assessment**

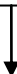

**Randomization**

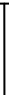

**Technology-  
assisted Case  
Management  
Intervention  
Group**

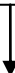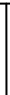

**Usual Care  
Group**

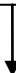

**3 Month Follow-up**

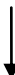

**6 Month Follow-up**
